13           **Summary**

14

15           The frequency specificity of conditioned dampening of hearing, when a loud sound is  
16 preceded by a warning sound, was investigated in a bottlenose dolphin. The loud sounds were 5-  
17 s tones of 16, 22.5, or 32 kHz, SPL of 165 dB rms re 1  $\mu$ Pa. Hearing sensitivity was tested at the  
18 same three frequencies. Hearing sensitivity was measured using pip-train test stimuli and  
19 auditory evoked potential recording. The test sound stimuli served also as warning sounds. The  
20 durations of the warning sounds were varied randomly to avoid locking a conditioning effect to  
21 the timing immediately before the loud sound. Hearing thresholds before the loud sound  
22 increased, relative to the baseline, at test frequencies equal to or higher than the loud sound  
23 frequency. The highest threshold increase appeared at test frequencies of 0.5 octaves above the  
24 loud sound frequencies.

25

26 **Introduction**

27

28 The negative impact of loud anthropogenic sounds on whales and dolphins manifests itself  
29 in a variety of disturbances of their mode of life. These sounds have been associated with the  
30 stranding of whales and dolphins (Evans and England, 2001). Strategies to protect whales and  
31 dolphins from intense sounds may be either based on considering marine mammals as passive  
32 objects (finding them and avoiding or reducing sound exposure) or as active subjects of the  
33 mitigation strategy using the avoidance behavior of the animals themselves. In turn, the active  
34 avoidance strategies may be based either on behavioral responses (avoiding sound contaminated  
35 environments) or specific individual responses like active control of their hearing sensitivity.

36 Avoidance behavior as a response to loud sounds has long been described in laboratory  
37 animals: it was shown that loud sounds can trigger avoidance responses as effectively as other  
38 noxious stimuli (Belluzzi and Grossman, 1969). Similar data have been obtained several seal  
39 species (Goetz and Janik, 2010). One may assume that loud sounds may be sometimes similarly  
40 aversive to whales and dolphins. Many observations in the wild note obviously aversive behavior  
41 of whales and dolphins as avoidance of the area of loud man-made sounds (Southall et al. 2007)

42 Until recently, the active control of hearing sensitivity was not considered as an effective  
43 mechanism for the mitigation of the impacts of loud sounds in whales and dolphins. However,  
44 recently several studies have revealed the ability of whales and dolphins to actively control their  
45 hearing sensitivity. Originally this ability was demonstrated during echolocation. Measures of  
46 the auditory evoked potentials during echolocation have shown that whales and dolphins change  
47 their hearing sensitivity in order to optimize the perception of the echoes (Supin et al., 2005,  
48 2010; Nachtigall and Supin, 2008; Linnenschmidt et al, 2012; Li et al, 2011; Supin and  
49 Nachtigall, 2012). The hearing sensitivity of a false killer whale *Pseudorca crassidens* was also  
50 shown to be more acute when the animal was searching by echolocation for targets than when  
51 targets were easily found (Supin et al, 2008). Later this capability was also demonstrated in  
52 conditions when it might serve to protect the hearing from the action of a loud sound. It has been  
53 found that a false killer whale and a bottlenose dolphin *Tursiops truncatus* are capable of  
54 dampening their hearing when a loud sound is preceded by a warning faint sound (Nachtigall and  
55 Supin, 2013, 2014). This in-advance damping of hearing had typical features of a conditioning  
56 effect and may therefore be an effective mechanism for hearing protection.

57 However, many features of the effect remained undefined after these studies and require  
58 further investigation. In particular, it is not known yet, whether the effect depends on the  
59 frequency of the loud sound, and whether it is frequency specific, i.e., whether the damping of  
60 sensitivity appears within overall frequency range of the subject's hearing or only within a

61 certain frequency band. In the studies mentioned above, only one frequency of the loud sound  
62 was used, and the dampening of hearing sensitivity has been demonstrated also at only one (in  
63 the false killer whale) or two (in the bottlenose dolphin) frequencies. Therefore, to further  
64 understand the mechanisms and features of the conditioned hearing control in odontocetes, the  
65 spread of the conditioning dampening effect along the frequency scale, depending on the  
66 frequency of the loud, sound was investigated.

67 In order to reach this goal, the hearing sensitivity before the presentation of a loud sound  
68 was measured at various frequencies: below, at, and above the loud sound frequency. Hearing  
69 was measured using the auditory evoked potential (AEP) method since it allowed rapid  
70 audiometric measurements without preliminary training of the animal (Supin et al., 2001).  
71 Rhythmic trains of short pips were used as effective test stimuli yielding robust rhythmic AEP  
72 responses known as the envelope-following response (EFR) (Supin and Popov, 2007). This test  
73 was used for fast sensitivity measurements within a short time of warning before the loud sound.

74

## 75 Results

76

### 77 *Evoked potential features in the baseline sessions.*

78 In a baseline series, the hearing sensitivity was measured during three experimental sessions  
79 with presentation of only faint test stimuli, without loud sounds. The test stimuli were trains of  
80 short tone pips (*St* in Fig. 1). Each train contained 16 pips of a rate of 1000/s. The trains were  
81 repeated at a rate of 15/s during each measurement time; that time length randomly varying trial-  
82 by-trial from 5 to 30 s. Thus, 75 to 450 tone pips were presented within each trial. The test  
83 stimulus level was constant during each trial and varied randomly trial-by-trial from 85 to 120  
84 dB re 1  $\mu$ Pa *rms* in order to determine the baseline hearing thresholds of the animal.

85 The stimuli produced well defined EFRs as exemplified in Figure 1A for a test frequency of  
86 32 kHz. Each of the presented waveforms was obtained as a result of averaging of 1275 to 3500  
87 original responses (test stimulus presentations) obtained during 10 trials, each of 75 to 450  
88 stimulus presentations. The obtained waveforms featured a response to the pip train consisting of  
89 a series of waves of the same frequency (1 kHz) as the rate of tone pips within the test stimulus  
90 (1000/s). Data show a response lag as long as about 3 ms (beginning) to 5 ms (end) relative to  
91 the stimulus confirming the neurophysiological origin of the waveforms.

92 The EFR amplitude was dependent on the stimulus level. In the presented example shown in  
93 Fig 1, the response was maximal at levels of 115 to 120 dB re 1  $\mu$ Pa *rms* and the amplitude  
94 shows a decrease with stimulus level decrease and becomes indistinguishable from noise at a  
95 level of 90 dB re 1  $\mu$ Pa *rms*.

96

97 *Evoked potential features in the conditioning sessions.*

98 In each trial of the conditioning sessions during which both faint and loud sounds were  
99 presented, the faint test stimuli (the same pip trains as describe above) were repeated at the same  
100 rate of 15/s during a test time that randomly varied from 5 to 30 s (i.e., from 75 to 450 tone pip  
101 presentations during each trial). Immediately after the end of the test stimuli presentation (i.e., 5  
102 to 30 s after starting the stimulation) a loud sound followed as a tone of a level of 165 dB re 1  
103  $\mu\text{Pa}$  rms and duration of 5 s. Thus, the initial test stimuli served also as a warning signal that  
104 signaled that the loud sound was about to arrive. Therefore, for the conditioning sessions, these  
105 faint sounds preceding the loud one are referred to as test/warning stimuli, and the 5 to 30 s time  
106 of their presentation is referred to as test/warning time. The 5-to-30 s test/warning time was used  
107 because this rather short warning resulted in successful conditioned hearing dampening, whereas  
108 longer warning (15 to 75 s, mean 45 s) resulted in a less prominent effect (Nachtigall and Supin,  
109 2014). Within the chosen limits of durations, trial-by-trial randomization of the test/warning time  
110 served to exclude the linking of a conditioning effect to a particular time after the warning signal  
111 onset.

112 The test/warning stimulus level was constant during each trial and varied randomly trial-by-  
113 trial from 85 to 120 dB re 1  $\mu\text{Pa}$  rms. During the test/warning time, brain responses were  
114 collected and averaged in the same manner as in the baseline sessions, to obtain an EFR to  
115 stimuli of various levels. The obtained EFR waveforms are exemplified in Figure 1B for the  
116 conditioning experiment with a test/warning signal of the 32 kHz carrier frequency (the same as  
117 in the baseline experiment shown in Fig. 1A). The loud sound following the test/warning signal  
118 was of 22.5 kHz frequency. Each of the waveforms was obtained by averaging of 1050 to 3500  
119 (depending on the randomly varying test/warning times) of original waveforms recorded in 10  
120 trials with test/warning stimulus level varied randomly from trial to trial.

121 In the same way as during the baseline trials, in the conditioning trials the EFR amplitude  
122 was also dependent on the stimulus level (Fig. 1B). However a comparison of Figures 1 A and B  
123 demonstrates that within all of the stimulus levels, the responses in the conditioning trials were  
124 substantially less than at the same levels found during the baseline trials. Unlike levels found  
125 during the baseline trials that resulted in very detectable responses at levels of 95 re 1  $\mu\text{Pa}$  rms  
126 and above, in the conditioning trials the response was absent at stimulus levels of 105 dB re 1  
127  $\mu\text{Pa}$  and below.

128

129 *Behavior associated with loud sound exposure*

130 At the presentation of the first loud sound (after the completion of the baseline series), an  
131 element of aversive behavior of the subject was observed as a short backward movement, but the  
132 animal did not leave the listening position. This ‘aversive’ behavior disappeared during the first  
133 experimental (with loud sound exposures) session after five or six trials. During subsequent  
134 sessions, occasionally aversive behavior was observed as a little head shaking during the loud  
135 sound but the animal never left its position. No aversive behavior was observed during  
136 presentation of the faint test/warning sounds. During all of the sessions, the animal stayed in the  
137 position for measurement until it was called back by the trainer for appropriate fish  
138 reinforcement.

139

140 *Evaluation of conditioning effects*

141 In order to quantitatively evaluate hearing sensitivity, the frequency spectra of the averaged  
142 response waveforms were obtained. Each record was obtained by averaging of all original  
143 records in trials varied randomly from 5 to 30 s. The spectra were computed for a 16-ms long  
144 time window, from the 5<sup>th</sup> to the 21<sup>st</sup> ms after the beginning of the pip train, i.e., within a window  
145 of the same length as the stimulus pip train, with a 5-ms offset for the neurophysiological  
146 response lag. For the response waveforms exemplified in Fig. 1 A and B, the spectra are  
147 presented in Fig. 2 A and B, respectively. The spectra contained a definite peak at the frequency  
148 of 1 kHz which is equal to the stimulus pip rate. The magnitude of the 1-kHz spectrum  
149 component was used as a quantitative measure of the EFR magnitude and was plotted as a  
150 function of stimulus level.

151 These magnitude-vs-level functions were obtained for both baseline and conditioning phases  
152 of the study. The conditioning portion of the study was performed with all combinations of three  
153 frequencies of the test/warning signals, namely, 16, 22.5, and 32 kHz (i.e., 1/2 octave steps), and  
154 the same three frequencies of the loud sound. During each conditioning session, combinations of  
155 all three frequencies of the test/warning signals with one loud sound frequency were tested. Loud  
156 sounds of different frequencies were presented in different sessions. The magnitude-vs-test level  
157 functions were obtained by averaging the records from all of the experimental sessions (950 to  
158 3600 original records averaged for each waveform and respective spectrum). Thus, overall, nine  
159 functions for the conditioning phase plus three baseline functions for the three test frequencies  
160 were obtained. All of them are presented in Fig. 3.

161 The results indicate that certain combinations of frequencies of the test/warning and loud  
162 sound resulted in substantial (5 to 15 dB) shifts of the magnitude-vs-level functions relative to  
163 the baseline for the same test frequencies, whereas other combinations resulted in no noticeable

164 shift. In particular, at a 16-kHz test, the magnitude-vs-level function shifted relative the baseline  
165 by about 10 dB after the 16-kHz loud sound but not after other loud sounds (Fig. 3A). At a test  
166 frequency of 22.5 kHz, the shifts were about 10 dB after 16-kHz and 22.5-kHz loud sounds but  
167 not after the 32-kHz sound. Finally, at a test frequency of 32 kHz, the shifts were about 5 dB  
168 after 16-kHz and 32-kHz sound and about 15 dB after the 22.5-kHz sound. A statistical  
169 assessment (one-way ANOVA) of the effects of the loud sound provided results as follows: (1)  
170 For the test frequency of 16 kHz, the difference between the baseline and experimental (with the  
171 loud sound) data approached the standard criterion of statistical confidence for the loud sound  
172 frequency of 16 kHz ( $p = 0.06$ ) whereas for the loud sound frequencies of 22.5 and 32 kHz the  
173 experimental data featured high probability of similarity with the baseline ( $p = 0.96$  and  $p = 0.86$ ,  
174 respectively); (2) For the test frequency of 22.5 kHz, the experimental data significantly differed  
175 from the baseline at the loud sound frequencies of 16 and 22.5 kHz ( $p = 0.03$  and  $p = 0.03$ ,  
176 respectively) whereas the loud sound of 32 kHz resulted in high probability of similarity with the  
177 baseline ( $p = 0.92$ ); and (3) finally, for the test frequency of 32 kHz, the experimental data  
178 significantly differed from the baseline at all frequencies of the loud sound: 16, 22.5, and 32 kHz  
179 ( $p = 0.03$ ,  $p = 0.005$ , and  $p = 0.01$ , respectively).

180 To summarize all these data, response thresholds were evaluated for each of the  
181 conditioning combinations as well as for the baseline data. To evaluate a threshold, the oblique  
182 part of the magnitude-vs-level function was approximated by a straight regression line. The  
183 “oblique” part of the function was defined as a part where the gradient was not less than 10 nV  
184 *rms* per 5-dB increment, i.e., 2 nV/dB (see Methods). The intersection of the regression line with  
185 the zero-magnitude level was used as an estimate of the AEP threshold.

186 The resulting threshold estimates are presented in Figure 4A as threshold-vs-test frequency  
187 functions. The baseline function actually is a segment of the audiogram within the range of 16 to  
188 32 kHz. The other functions show the modified audiogram segments as a result of conditioned  
189 sensitivity changes. The modifications were different depending on the frequency of the loud  
190 sound. This finding may be more obvious if the same data are presented as threshold shift  
191 dependence on the interrelation between the test/warning and loud sound frequencies (Fig. 4B).  
192 The threshold did not noticeably differ from the baseline when the test/warning sound frequency  
193 was 0.5 to 1 octave *below* the loud sound frequency (from -1 to -0.5 octaves in Fig. 4B). The  
194 thresholds did increase when the test/warning sound frequency was *equal to or above* the loud  
195 sound frequency (from 0 to +1 octave in Fig. 4B). The maximum threshold increase was  
196 observed at a test/warning frequency 0.5 oct above the loud sound frequency (15.5 dB at 22.5  
197 kHz loud sound and 32 kHz test/warning signal; 10.0 dB at 16 kHz loud sound and 22.5 kHz  
198 test/warning signal).

199  
200  
201  
202  
203  
204  
205  
206  
207  
208  
209  
210  
211  
212  
213  
214  
215  
216  
217  
218  
219  
220  
221  
222  
223  
224  
225  
226  
227  
228  
229  
230  
231  
232  
233

## Discussion

### *Conditioned or non-conditioned effect?*

The study was designed to investigate features of the effects of hearing conditioning expected when the appearance of a loud sound can be predicted by a preceding faint sound. However, in the experiments described above, trials with the loud sound followed one another many times during each experimental session. Therefore, direct (non-conditioned) effects of the loud sound such as temporary threshold shift (TTS) could not be totally excluded by definition. The question concerning the nature of the dampening effect seems even more important because of the data presented herein on frequency specificity of this effect. Indeed, TTS is more prominent at frequencies equal to or higher than the fatiguing-sound frequency (Schlundt et al., 2000; Nachtigall et al., 2004; Finneran et al., 2007; Lucke et al., 2009; Mooney et al., 2009; Popov et al., 2011, 2013). Thus, both any non-conditioned TTS effect and the effect described in the present study feature some similar frequency specificity.

Arguments in favor of the conditioned, rather than non-conditioned, nature of the observed hearing dampening were presented when the effect was previously described in a false killer whale (Nachtigall and Supin, 2013). Moreover, recently published data obtained in the same subject and under the same experimental conditions as in the present study have shown that the dependence of the effect on temporal interrelations between the test/warning and loud sound indicates the conditioning nature of the observed dampening of hearing sensitivity (Nachtigall and Supin, 2014). The dampening effect did not depend on inter-trial intervals, i.e., on how frequently loud sounds were presented and how long the delay was between the loud sound and the subsequent test. On the contrary, the effect depended on the duration of the warning before the loud sound. Both these features of the hearing dampening effect are contradictory to the predictions of any unconditioned nature of the dampening effect and are not contradictory to the conditioned nature of the effect because characteristics of the conditioning stimuli may influence the success of conditioning.

The absence of unconditioned hearing dampening (TTS) within the present experiment is reasonable because of the rather low sound exposure level (SEL) of the loud sounds. The loud sound of SPL of 165 dB re 1  $\mu$ Pa and duration of 5 s has SEL as low as 172 dB re 1  $\mu$ Pa<sup>2</sup>s. It is much lower than the SEL producing TTS in the majority of odontocete studies (Finneran et al., 2000, 2007; Nachtigall et al., 2003; Popov et al., 2011, 2013, 2014). The total exposure during a whole session (54 trials, see “Methods”) was 189 dB re 1  $\mu$ Pa<sup>2</sup>s, however, this total exposure consisted of short (5 s) exposures separated by long (50 s or longer) intervals (i.e., duty cycles



234 less than 0.1). This sort of intermittent exposure is much less effective than continuous exposure  
235 at producing effects like TTS (Finneran et al., 2010) due to partial recovery during the long time  
236 periods between exposures. TTS recovery during just a few minutes after low-SEL exposures  
237 has been demonstrated directly (Popov et al., 2013, 2014). So the absence of long-term TTS is  
238 very reasonable, and the hearing dampening effect investigated in the present study may be  
239 assumed therefore to be a manifestation of the conditioning-based control of hearing sensitivity.

240 Assuming that the observed effect of dampening hearing sensitivity was conditioned, these  
241 data indicate similar frequency dependence between the conditioning effect and TTS. It is  
242 possible that this similarity might indicate the involvement of common, or similar, mechanisms  
243 of these two processes.

244

#### 245 *Generalization of the data*

246 The generality and implications of these data are limited by the fact that they were obtained  
247 from only one subject. However the effect obtained in the present study was similar to that  
248 described previously in another odontocete subject of another species, the false killer whale  
249 (Nachtigall and Supin, 2013). Despite some quantitative differences that may result from a  
250 difference in the subject species, individual animals, and signal parameters, qualitatively the  
251 dampening of hearing when a loud sound is preceded by a faint warning sound looked similar in  
252 both investigations. This would argue in favor of the hypothesis that the conditioned control of  
253 hearing sensitivity is a feature of the odontocete auditory system.

254

#### 255 *Frequency specificity and potential mechanisms of the hearing conditioning effect*

256 A new finding of this study was that the hearing dampening did not cover the whole  
257 frequency range of hearing, or a certain constant part of the hearing range, but appeared within a  
258 limited frequency band linked to the loud sound frequency. The dampening always appeared at  
259 frequencies that were equal to or above the loud sound frequency. This finding is relevant to  
260 understanding the mechanisms of the hearing conditioning effect.

261 Among the possible mechanisms of hearing sensitivity control, first of all, the acoustic, or  
262 stapedial, reflex is considered because of many indications of hearing regulation in this way, i.e.,  
263 by reflexively tightening the stapedial muscle in the middle ear. In humans, this mechanism is  
264 responsible for the reduction of hearing sensitivity produced by loud sounds (Hung and Dallos,  
265 1972). Bats, during echolocation, contract their middle ear muscles synchronously with  
266 vocalization to attenuate the amount of self-stimulation by as much as 20 dB (Henson, 1965). So  
267 the role of the same mechanism in conditioned hearing control in odontocetes might be  
268 hypothesized. However, the frequency specificity found within this study is contradictory to this

269 explanation. Execution of the sensitivity control through one and the same stapedial muscle  
270 cannot selectively influence different frequency bands depending on frequency of the reflex-  
271 triggering signal.

272 More probably, the mechanism will be found in neuronal events. The auditory system  
273 includes a variety of descending pathways that control the auditory perception at several levels,  
274 including the cochlear level (Winer, 2005). It was shown long ago that activation of the  
275 descending pathways suppresses the cochlear responses (Galambos, 1956; Suga and Schlegel,  
276 1972). This control can be carried out, in particular, through the outer hair cells which form the  
277 “active mechanism” responsible for high sensitivity and acute frequency tuning of hearing.  
278 Descending auditory pathways project directly to the outer hair cells, thus being capable of  
279 controlling hearing sensitivity (Guinan, 2006). Apart from the control through the outer hair  
280 cells, descending regulatory influences between the auditory centers are also possible. Contrary  
281 to the contraction of the stapedial muscle, all the neural influences may be addressed to  
282 particular loci of the tonotopic projections within the auditory system, thus being frequency  
283 specific. Involvement of this mechanism in the conditioned hearing control in odontocetes  
284 cannot be excluded, although direct indications are absent at present.

285

286

## Methods

287

### *Experimental facilities and subject*

288  
289 The study was carried out in the facilities of the Hawaii Institute of Marine Biology, Marine  
290 Mammal Research Program. The subject was a captive born female bottlenose dolphin known to  
291 be 28 years old with a long history of experimental work (e.g. Harley et al, 1996). The subject  
292 was trained to accept suction-cup electrodes for brain-potential recording, to swim into a hoop  
293 station and to listen to the sound stimuli. She had a moderate hearing loss that involved a high  
294 frequency cut-off at 45 kHz and increased thresholds below this cut-off; her hearing thresholds  
295 within a range from 16 to 38 kHz were 80 to 90 dB re 1  $\mu$ Pa which was higher than typical of  
296 bottlenose dolphins recently wild-caught (Popov et al., 2007) and higher than in-captivity held  
297 bottlenose dolphins and in many other odontocete species (rev. Au, 1993; Supin et al., 2001; Au  
298 and Hastings, 2008), however it was considered as still suitable for investigation of basic hearing  
299 processes. The subject was housed in a floating pen complex. Experiments were carried out in a  
300 section of the pen complex  $8 \times 10$  m in size.

301

302 *Experimental procedure*

303 Each experimental session started by calling the subject to the trainer and attaching surface  
304 latex suction cups containing electrodes for brain-potential recording. The 10-m long thin  
305 flexible cables connecting the suction cups to the equipment allowed the dolphin to move over  
306 much of the experimental pen. After attaching the suction cups, 54 experimental trials were run  
307 during a daily session.

308 Each trial started by sending the subject to a listening station. The station was a hoop  
309 fastened at a depth of 80 cm below the water surface. During stationing, low-level test sounds  
310 were played which served to measure hearing sensitivity (see below: “Signal parameters and  
311 presentation timing”). During the presentation of the test sounds, brain potentials, specifically  
312 EFR evoked by the test stimuli, were recorded. These responses served to measure hearing  
313 sensitivity (see below: “AEP acquisition and hearing-sensitivity assessment”). In baseline  
314 measurement trials, only these test sounds were presented. In experimental (conditioning) trials,  
315 immediately after the test sound, a high-level (loud) sound was played. Since the test sounds  
316 always preceded the loud sound, they also served as conditioning stimuli warning the subject of  
317 the oncoming loud sound. At the completion of each trial, a secondary reinforcing whistle was  
318 blown and the subject was called back from the listening station and received fish reinforcement.

319  
320 *Signal parameters and presentation timing*

321 The duration of the test/warning sound in which the hearing was measured varied randomly  
322 trial-by-trial from 5 to 30 s so that the animal could not anticipate the end of the warning and  
323 become conditioned to the time. The loud sound was always 5-s long, played immediately after  
324 the test/warning time. Trials followed one another with inter-trial intervals of  $55 \pm 5$  s.

325 The test/warning signals were rhythmic trains of tone pips, each train 16-ms long containing  
326 16 pips at a rate of 1 kHz. The trains were played at a rate of 15/s during the test/warning time as  
327 specified above (Fig. 5A). Each pip contained 8 cycles of a carrier frequency (Fig. 5B). The  
328 carrier frequency was 16, 22.5, or 32 kHz. From trial to trial, levels of the test/warning signals  
329 varied up and down from 85 to 120 dB re 1  $\mu$ Pa *rms*, by 5-dB steps, i.e., total of 8 levels.

330 Variation of the test signal level was random and was presented as a method of constants rather  
331 than a staircase procedure, i.e., the level did not depend on the response presence or absence.  
332 Independent of the response presence or absence, all the 85 to 120 dB range was examined to  
333 obtain information on the response magnitude at both threshold and supra-threshold levels.

334 In every session, the test/warning signals were presented at all three frequencies (16, 22.5,  
335 and 32 kHz), 6 of 8 levels of each frequency. Each combination of the test/warning signal  
336 frequency and level was repeating 3 times, so each session contained overall of 54 trials.

337 The loud sound was a tone of a sound pressure level (SPL) of 165 dB re 1  $\mu$ Pa *rms* lasting 5  
338 s. Loud sound frequencies were 16, 22.5, or 32 kHz.

339

#### 340 *Instrumentation for sound generation and data collection*

341 Both the test/warning and loud sounds were digitally synthesized by a standard personal  
342 computer using a custom-made program (virtual instrument) designed with the use of LabVIEW  
343 software (National Instruments, Austin Texas, USA). The synthesized signal waveforms were  
344 played at an update rate of 256 kHz through a 16-bit digital-to-analog converter of a USB-6251  
345 acquisition board (National Instruments, Austin Texas, USA). The test signals were amplified by  
346 a custom-made power amplifier (passband of 1 to 150 kHz), attenuated by a custom-made low-  
347 noise resistor attenuator, and played through an ITC-1032 piezoceramic transducer (International  
348 Transducer Corporation, Santa Barbara, California, USA) positioned at a depth of 80 cm (i.e.,  
349 the same depth as the hoop station center) at a distance of 1 m in front of the animal's head.

350 Signals for the loud sound were amplified by a Hafler P3000 power amplifier (Hafler,  
351 Tempe, Arizona, USA) and played through the same transducer. The transducer was connected  
352 alternatively either to the test sound attenuator or to the loud sound power amplifier through an  
353 electromagnetic relay, so the background noise of the power amplifier output never overlapped  
354 the low-voltage (down to a few mV) test signals. The reconnection was done simultaneously  
355 with the loud sound onset, to avoid any cue preceding the loud sound. Both test and loud sounds  
356 were calibrated by a B&K 8103 hydrophone (Bruel & Kjaer, Naerum, Denmark) positioned in  
357 the hoop station in the absence of the subject.

358 Brain potentials were picked up through 10-mm gold-plated surface electrodes mounted  
359 within 50-mm latex suction cups, the active electrode at the vertex, and reference electrode at the  
360 dorsal fin. Brain potentials were fed through shielded cables to a balanced custom-made brain-  
361 potential amplifier based on an AD620 chip (Analog Devices, Norwood MA, USA) and  
362 amplified by 60 dB within a frequency range from 0.2 to 5 kHz. The amplified signal was  
363 entered into a 16-bit analog-to-digital converter which was one A/D channel of the same NI  
364 USB-6251 acquisition board that served for sound generation. The digitized signals were  
365 processed in a standard personal computer.

366

#### 367 *Brain potential acquisition and hearing sensitivity assessment*

368 The hearing sensitivity assessment was based on recording the EFR to the test tone pips. The  
369 brain potentials were averaged on-line within every trial. EFR records obtained by on-line  
370 averaging were sorted according to the stimulus frequency and level and were additionally  
371 averaged off-line among the trials to obtain final low-noise EFR records. A 16-ms long part of

372 the record, from 5<sup>th</sup> to 21<sup>st</sup> ms, containing the EFR was Fourier transformed to obtain its  
373 frequency spectrum. The spectrum peak magnitude at the stimulation rate (1 kHz) was taken as  
374 the EFR magnitude. The EFR magnitudes evaluated in this way were plotted as a function of  
375 test-signal level. An oblique part of the function was approximated by a straight regression line  
376 (see Fig. 3 above). This “oblique” part of the function was defined as a part with point-to-point  
377 gradients not less than 10 nV per 5-dB level increment (2 nV/dB). This arbitrary criterion was  
378 chosen as allowing to separate the level-dependent segment of the voltage-vs-level function from  
379 its flat parts presenting the background noise at subthreshold stimulus levels and “saturation”  
380 range at high stimulus levels. The point of interception of the regression line with the zero  
381 response magnitude level was taken as the threshold estimate (Supin and Popov, 2007).

382

### 383 **Acknowledgements**

384 This research project was approved under permit from the National Marine Fisheries Service  
385 to Paul E. Nachtigall. This manuscript is contribution number XXXX of the Hawaii Institute of  
386 Marine Biology.

387

### 388 **Funding**

389 This research project was supported by Exxon Mobil's Ocean Science Program with the  
390 assistance of Dr. Gary Isaksen.

391

### 392 **Author contribution**

393 The authors contributed equally to the completion of this effort.

394

### 395 **Competing interests**

396 No competing interests declared.

397

### 398 **List of Abbreviations**

399

400 AEP – Auditory evoked potential

401 EFR – envelope following response

402 Oct – octave

403 PTS – permanent threshold shift

404 RMS – root mean square

405 SEL – sound exposure level

406 SPL – sound pressure level

407 TTS – temporary threshold shift  
408  
409  
410

411 **References**

412

413 Au, W. W. L. (1993). *The Sonar of Dolphins* (Springer-Verlag, New York), 277 pp.

414 Au, W. W. L., and Hastings, M. C. (2008). *Principles of Marine Bioacoustics* (Springer-Science,  
415 New York), 677 pp.

416 Belluzzi, J.D, Grossman, S.P (1969) Avoidance learning motivated by high-frequency sound and  
417 electric shock. *Physiology & Behavior*, **4**, 371-373.

418 Evans, D.L., England, G.R. (2001) Joint interim report. Bahamas marine mammal stranding  
419 event of 15-16 March 2000. *U.S. Government Printing Press*, Washington D.C. 59 Pages.

420 Finneran, J. J., Carder, D. A., Schlundt, C. E. and Dear, R. L.(2010). Temporary threshold shift  
421 in a bottlenose dolphin (*Tursiops truncatus*) exposed to intermittent tones. *J. Acoust. Soc.*  
422 *Am* **27**, 3267-3272.

423 Finneran, J.J., Schlundt, C.E., Branstetter, B., Dear,R (2007) Assessing temporary threshold shift  
424 in a bottlenose dolphin (*Tursiops truncatus*) using multiple simultaneous auditory evoked  
425 potentials. *J Acoust Soc Am* **122**, 1249-1264.

426 Finneran, J. J., Schlundt, C. E., Carder, D. A., Clerk J. A., Young J. A., Gaspin J. B., Ridgway,  
427 S. H. (2000) Auditory and behavioral responses of bottlenose dolphins (*Tursiops truncatus*)  
428 and a beluga whale (*Delphinapterus leucas*) to impulsive sounds resembling distant  
429 signatures of underwater explosions. *J Acoust Soc Am* **108**, 417-431.

430 Henson, O.W., Jr(1965). The activity and function of the middle-ear muscles in echolocating  
431 bats. *J. Physiol.* **180**, 871-887.

432 Galambos, R. (1956) Suppression of auditory nerve activity by stimulation of efferent fibers to  
433 cochlea. *J. Neurophysiol.* **19**, 424-437.

434 Goetz, T., Janik, V.M. (2010) Aversiveness of sounds in phocid seals: psycho-physiological  
435 factors, learning processes and motivation. *J Exp Biol* **213**, 1536-1548.

436 Guinan, J.J. (2006) Olivocochlear efferents: anatomy, physiology, function, and the  
437 measurement of efferent effects in humans. *Ear Hear.*, **27**, 589-607.

438 Harley, H., Roitblat, H.L. and Nachtigall, P.E. (1996) Object representation in the  
439 bottlenosed dolphin (*Tursiops truncatus*): Integration of visual and echoic  
440 information. *J Exp Psychol: Animal Behavior Processes*, **22** (2), 164-174.

441 Henson, O.W. Jr. (1965) The activity and function of the middle-ear muscles in echo-locating  
442 bats. *J Physiol* **180**, 871-887.

443 Hung, I.J., Dallos, P. (1972) Study of the Acoustic reflex in human beings. I. Dynamic  
444 characteristics. *J Acous Soc Am* **52**, 1168-1180.

- 445 Li, S. Nachtigall, P.E., Breese, M. (2011) Dolphin hearing during echolocation: evoked potential  
446 responses in an Atlantic bottlenose dolphin (*Tursiops truncatus*). *J Exp Biol* **214**, 2027-2035.
- 447 Linneschmidt, M., Beedholm, K., Wahlberg, M., Hojer-Kristensen, J., Nachtigall, P.E. (2012)  
448 Keeping returns optimal: Gain control elicited by dynamic hearing thresholds in a harbour  
449 porpoise. *Biol Letters. Proc Royal Soc B*. doi:10.1098/rspb.2011.2465.
- 450 Lucke, K., Siebert, U., Lepper, P. A., Blanchet, M.-A. (2009) Temporary shift in masked hearing  
451 thresholds in a harbor porpoise (*Phocoena phocoena*) after exposure to seismic airgun  
452 stimuli. *J Acoust Soc Am* **125**, 4060-4070.
- 453 Mooney, T. A., Nachtigall, P. E., Breese, M., Vlachos, S., and Au, W.W.L. (2009) Predicting  
454 temporary threshold shift in a bottlenose dolphin (*Tursiops truncatus*): The effect of noise  
455 level and duration. *J Acoust Soc Am* **125**, 1816-1826.
- 456 Nachtigall, P.E., Pawloski, J.L., Au, W.W. L. (2003) Temporary threshold shifts and recovery  
457 following noise exposure in the Atlantic bottlenosed dolphin (*Tursiops truncatus*). *J Acoust*  
458 *Soc Am* **113**, 3425-3429.
- 459 Nachtigall, P.E., Supin, A.Ya. (2008) A false killer whale adjusts its hearing when it  
460 echolocates. *J Exp Biol* **211**, 1714-1718.
- 461 Nachtigall, P.E., Supin, A.Ya. (2013) A false killer whale reduces its hearing sensitivity when a  
462 loud sound is preceded by a warning. *J Exp Biol* **216**, 3062-3070.
- 463 Nachtigall, P.E., Supin, A.Ya. (2014) Conditioned hearing sensitivity reduction in a bottlenose  
464 dolphin (*Tursiops truncatus*). *J Exp Biol* **217**, 2806-2813.
- 465 Nachtigall, P.E., Supin, A.Ya., Pawloski, J., and Au, W.W.L. (2004) Temporary threshold shift  
466 after noise exposure in the bottlenose dolphin (*Tursiops truncatus*) measured using  
467 evoked auditory potentials. *Marine Mammal Sci* **20** (4), 673-687.
- 468 Popov V.V., Supin A.Ya., Pletenko M.G., Tarakanov M.B., Klishin V.O., Bulgakova T.N.,  
469 Rosanova E.I. (2007) Audiogram variability in normal bottlenose dolphins (*Tursiops*  
470 *truncatus*). *Aquatic Mammals* **33**, 24-33.
- 471 Popov, V.V., Supin, A.Ya., Rozhnov, V.V., Nechaev, D.I., Sysuyeva, E.V., Klishin, V.O.,  
472 Pletenko, M.G. and Tarakanov, M.B. (2013) Hearing threshold shifts and recovery after  
473 noise exposure in beluga whales, *Delphinapterus leucas*. *J exp Biol*. **216**, 1587-1596.
- 474 Popov, V.V., Supin, A.Ya., Rozhnov, V.V., Nechaev, D.I., and Sysuyeva, E.V. (2014). The limits  
475 of applicability of the sound exposure level (SEL) metric to temporal threshold shifts (TTS)  
476 in beluga whales, *Delphinapterus leucas*. *J Exp Biol* **217**, 1804-1810.
- 477 Popov, V. V., Supin, A. Ya., Wang, D., Wang, K., Dong, L., and Wang, S. (2011) Noise-  
478 induced temporary threshold shift and recovery in Yangtze finless porpoises *Neophocaena*  
479 *phocaenoides asiaeorientalis*. *J Acoust Soc Am* **130**, 574-584.



480 Schlundt, C. E., Finneran, J. J., Carder, D. A., and Ridgway, S. H. (2000) Temporary shift of  
481 masked hearing thresholds of bottlenose dolphins, *Tursiops truncatus*, and white whales,  
482 *Delphinapterus leucas*, after exposure to intense tones. *J Acoust Soc Am* **107**, 3496-3508.

483 Southall B.L., Bowles A.E., Ellison W.T., Finneran J.J., Gentry R.L., Greene C.R. Jr., Kastak D.,  
484 Ketten D.K., Miller J.H., Nachtigall P.E., Richardson W.J., Thomas J.A., Tyack P.L.  
485 (2007) Marine Mammal Noise Exposure Criteria: Initial Scientific Recommendations.  
486 *Aquatic Mammals* 33, 411-521.

487 Suga, N., Schlegel, P. (1972) Neural attenuation of responses to emitted sounds in  
488 echolocating bats. *Science* **177** (4043) 82-84.

489 Supin, A.Ya., Nachtigall, P.E. (2012) Gain control in the sonar of odontocetes. *J Comp Phys A*.  
490 DOI 10.1007/a00359-012-0773-7

491 Supin A.Ya., Nachtigall P.E., Au W.W.L., Breese M. (2005) Invariance of evoked-potential  
492 echo-responses to target strength and distance in an echolocating false killer whale. *J*  
493 *Acous Soc Am* **117**, 3928-3935.

494 Supin A.Ya., Nachtigall P.E., Breese M..(2008) Hearing sensitivity during target presence and  
495 absence while a whale echolocates. *J Acous Soc Am* **123**, 534-541.

496 Supin A.Ya., Nachtigall P.E., Breese M. (2010) Target distance-dependent variation of hearing  
497 sensitivity during echolocation in a false killer whale. *J Acoust Soc Am***127**, 3830-3836.

498 Supin A.Ya., Popov V.V. (2007) Improved techniques of evoked-potential audiometry in  
499 odontocetes. *Aquatic Mammals* 33(1), 17-26.

500 Supin, A.Ya., Popov V.V., and Mass A.M. (2001) *The Sensory Physiology of Aquatic Mammals*  
501 (Kluwer, New York).332 pp.

502 Winer J.A. (2005) Decoding the auditory corticofugal system. *Hearing res.* 207, 1-9.

503

504

505 **Figure captions**

506

507 **Fig. 1.** Example of EFR records at various test-stimulus levels in baseline (no loud sound)  
508 measurements (A) and conditioning (with the loud sound of 22.5 kHz) experiments (B). Test  
509 frequency 32 kHz. Test-stimulus levels are indicated near the records in dB rms re 1  $\mu$ Pa,  $St$  –  
510 stimulus (pip train) envelope. In both (A) and (B), each record was obtained by averaging of all  
511 original records in trials varied randomly from 5 to 30 s.

512

513 **Fig. 2.** Frequency spectra of waveforms presented in Fig. 1 (A and B, respectively). Test-  
514 stimulus levels are indicated near the records in dB rms re 1  $\mu$ Pa. Vertical dashed lines mark the  
515 spectrum peak at the response frequency (1 kHz).

516

517 **Fig. 3.** EFR magnitude dependence on test signal level at test frequencies of 16 kHz (A),  
518 22.5 kHz (B), and 32 kHz (C) in baseline experiments (B) and in experiments with loud sound  
519 after each test/warning signal; frequencies of the loud sounds (16, 22.5, and 32 kHz) are  
520 indicated in the legends. Dashed straight lines – regression lines approximating the oblique  
521 segments of the functions.

522

523 **Fig. 4.** Thresholds and conditioned threshold shifts as functions of test frequency. **A.**  
524 Thresholds. Test frequency is specified in kHz and threshold in dB re 1  $\mu$ Pa, “Base” – baseline  
525 thresholds; “16”, “22.5”, and “32” - thresholds in experiments with loud sound of the specified  
526 frequency after each test/warning signal. **B.** Threshold shifts. Test frequency is specified in oct  
527 relative the frequency of the loud sound, and threshold shifts are specified in dB re baseline  
528 taken as zero (dashed line); “16”, “22.5”, and “32” – threshold shifts in experiments with loud  
529 sound of the specified frequency after each test/warning signal. Error bars – standard errors for  
530 regression line crossing zero level.

531

532 **Fig. 5.** Waveforms of test/warning stimuli at different time scales. **A.** Compressed time  
533 scale, two successive pip trains are presented. **B.** Extended time scale, two successive pip trains  
534 of 16 pips in the train are presented.

535



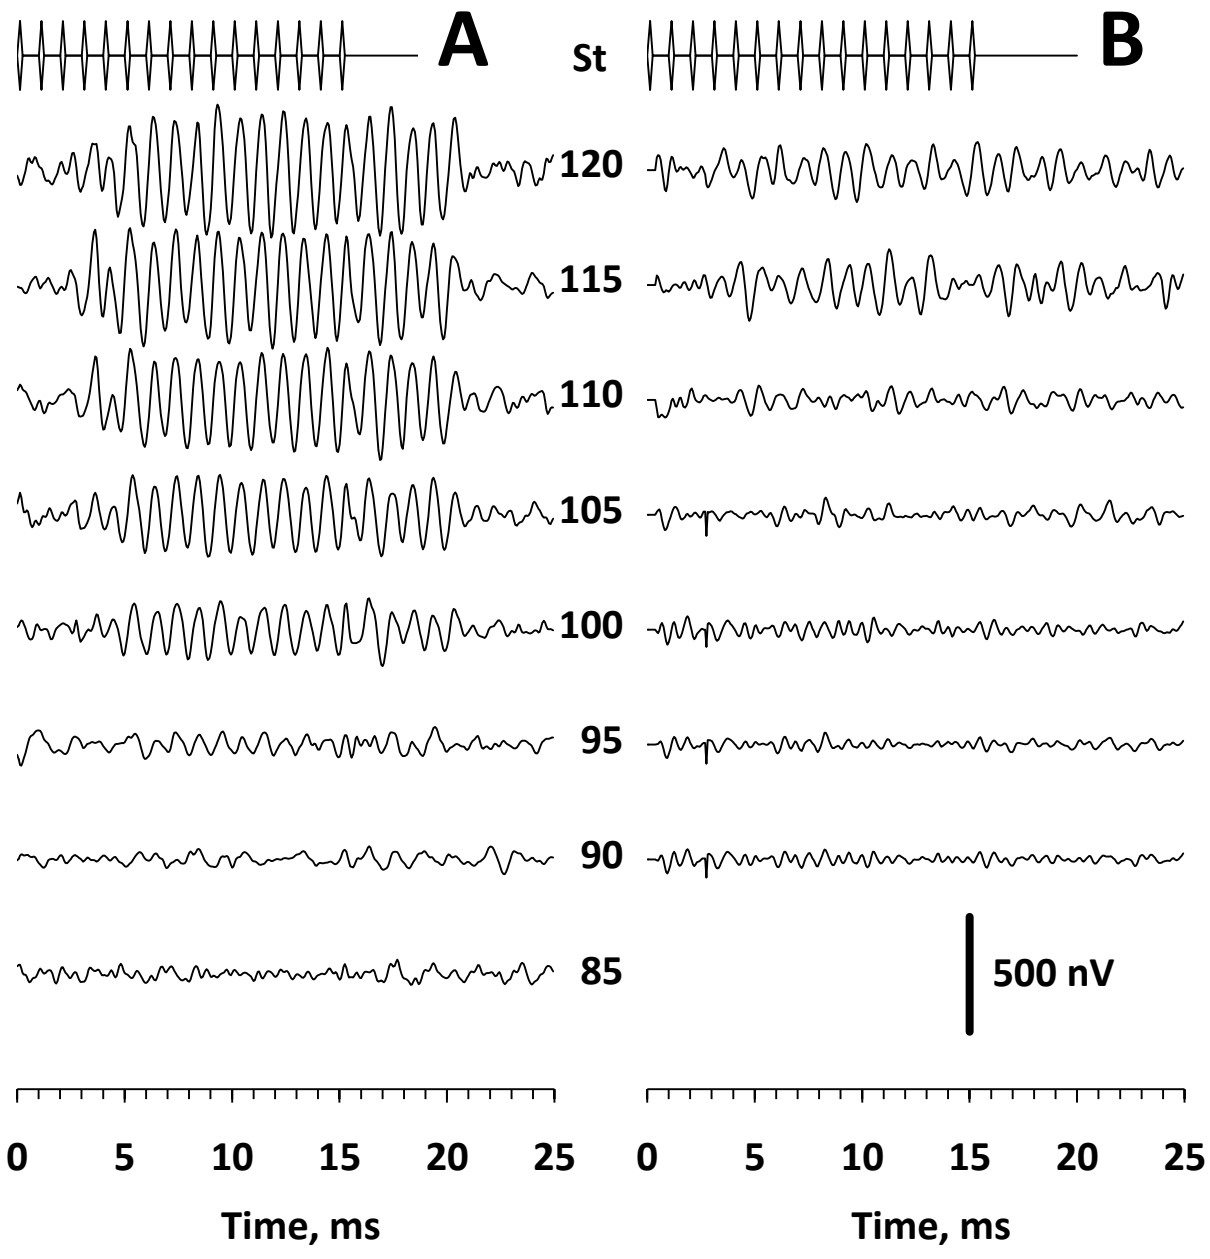

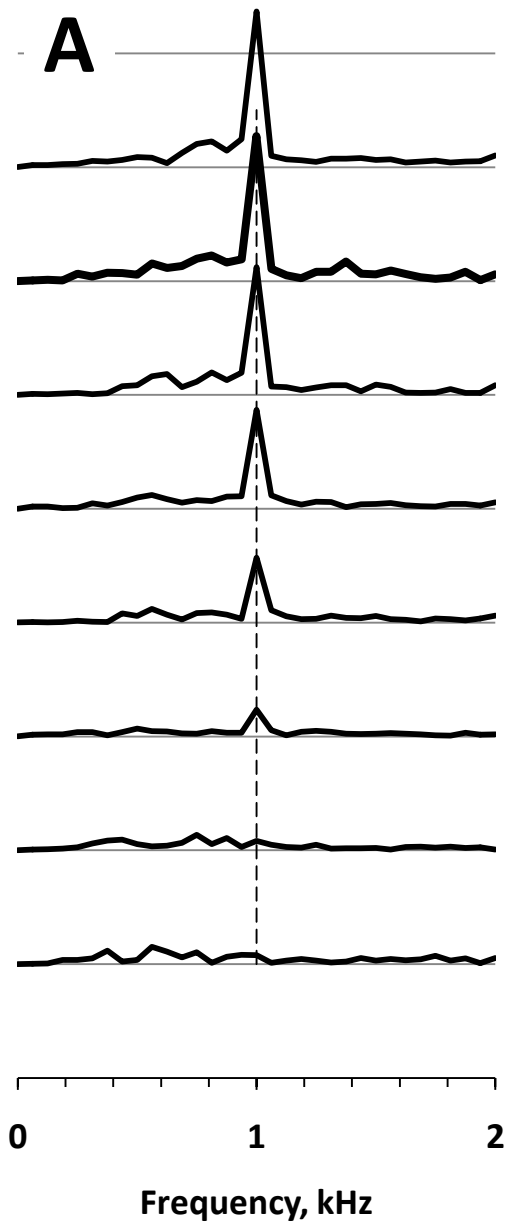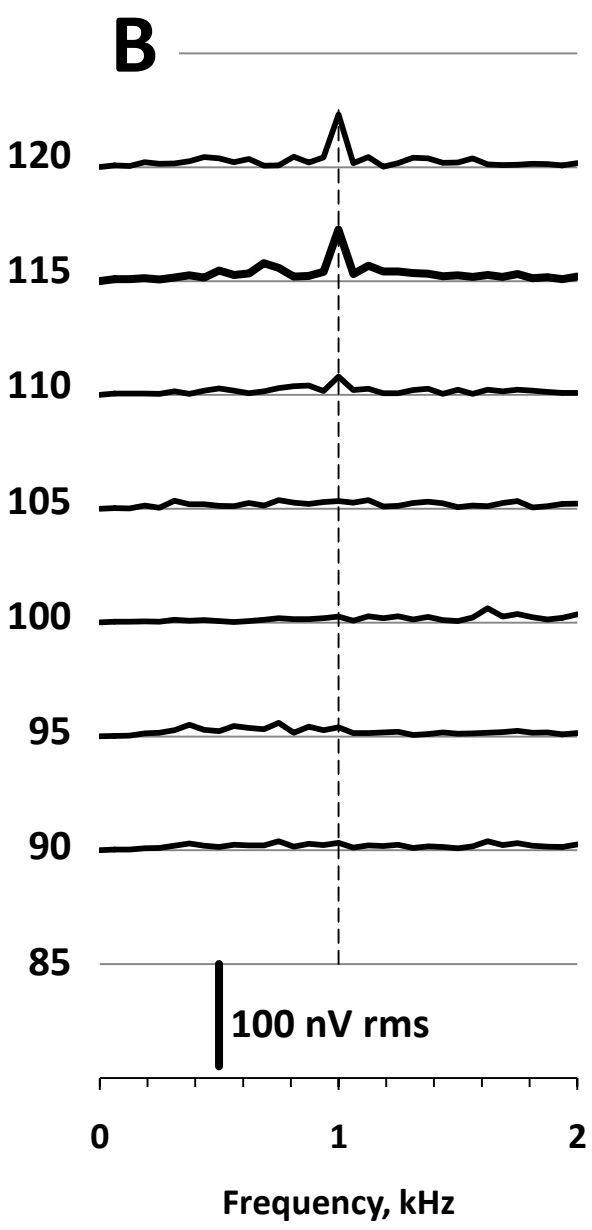

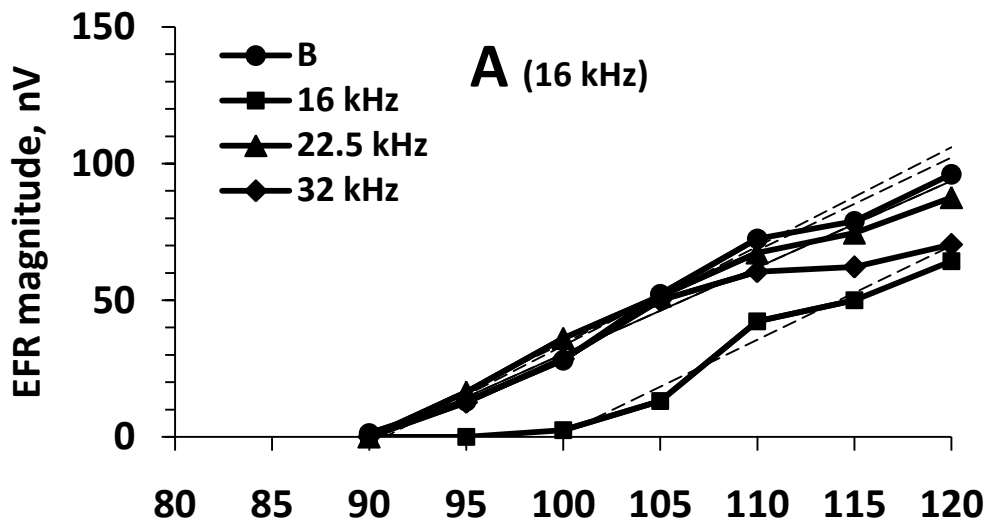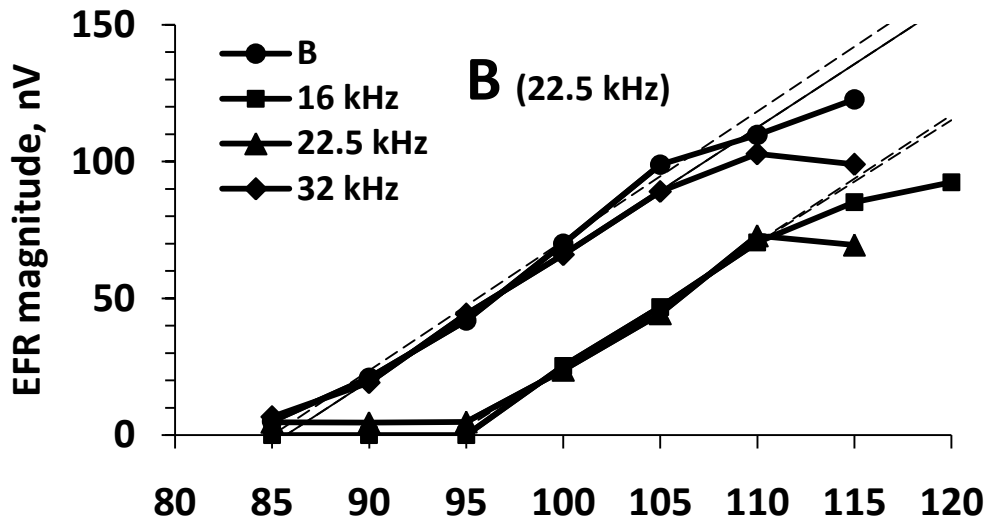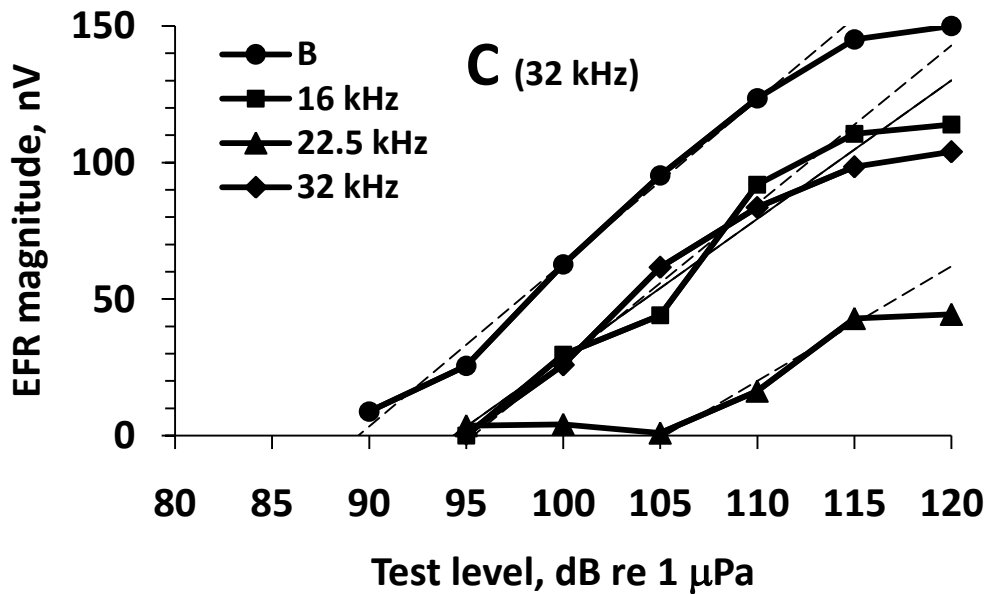

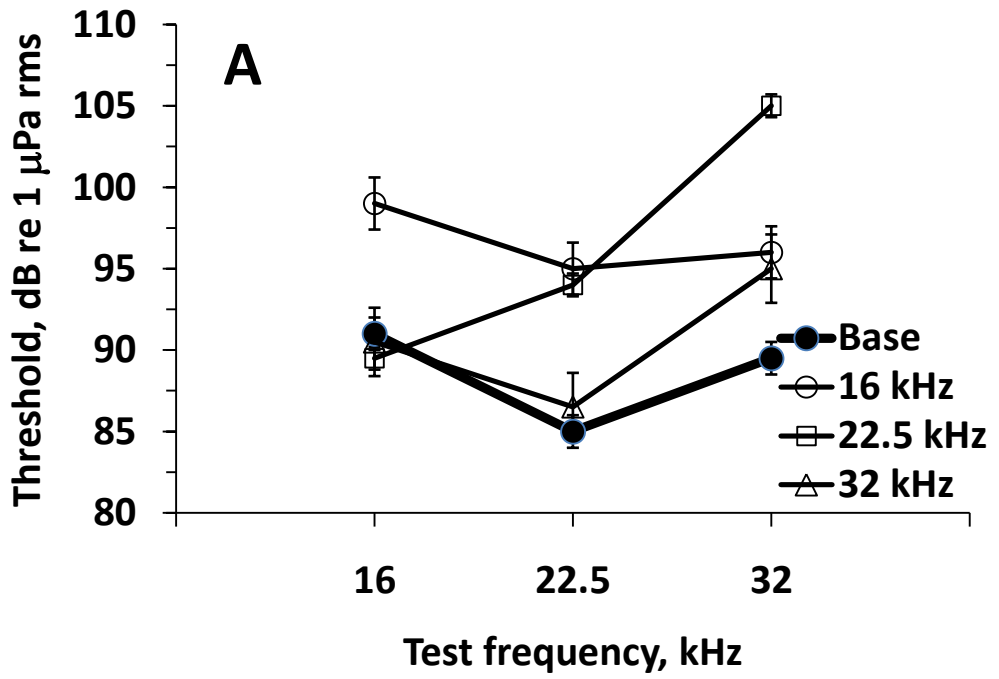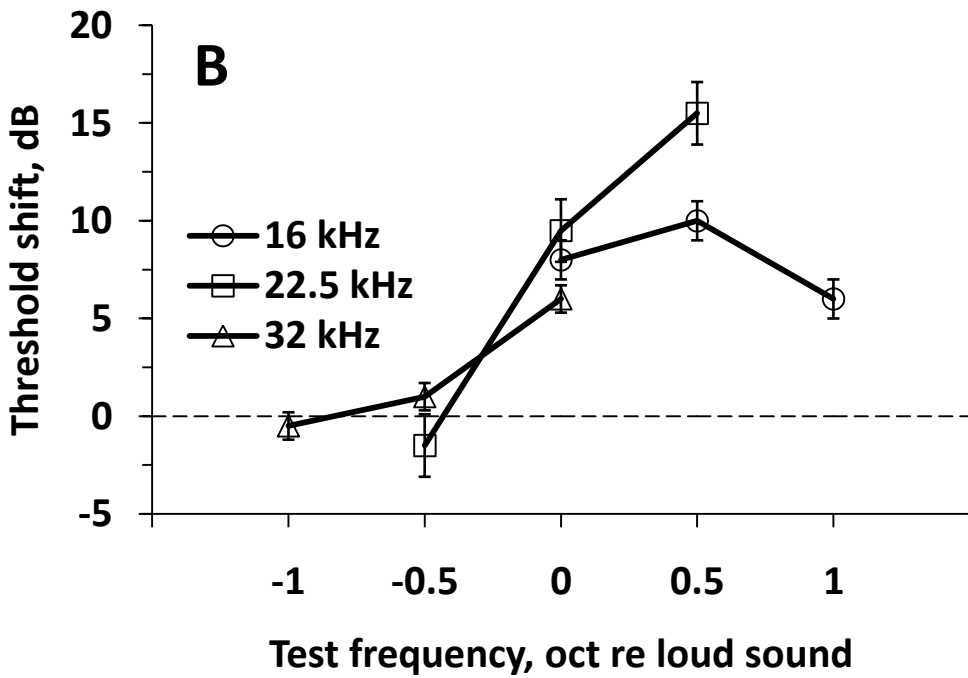

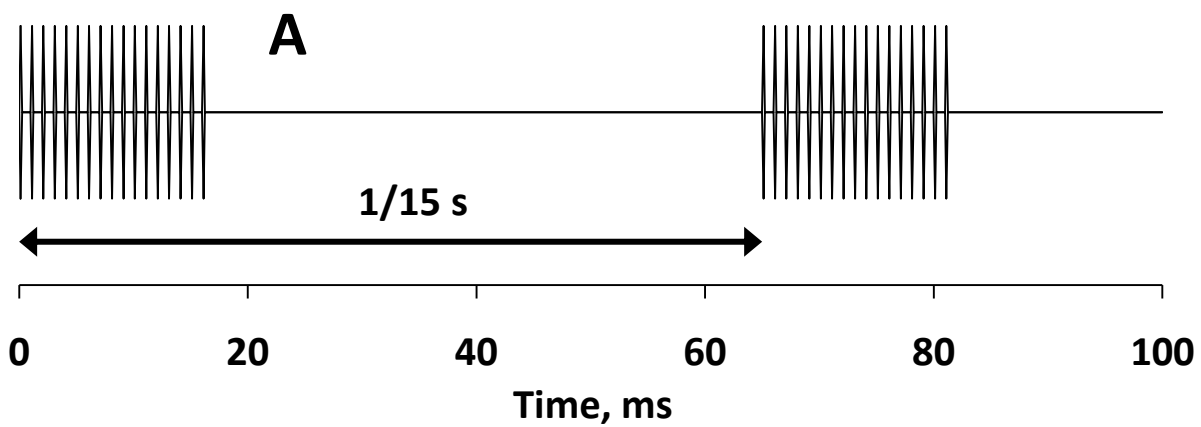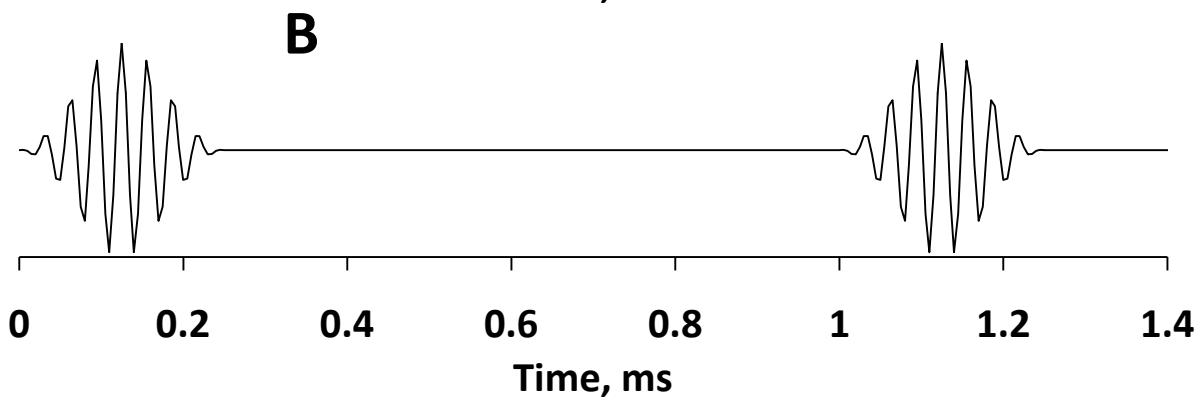

Source: https://cob.silverchair.com/jeb/article-pdf/doi/10.1242/jeb.114066/2033012/jeb_114066.pdf
